# Supplementary material
Source: PubMed Central journal article supplement (PMC8359728)
Supplement: NIHMS1728573-supplement-1.pdf [file NIHMS1728573-supplement-1.pdf]

**Supplemental Table.** Cancer subtypes and International Classification of Diseases (ICD-9), Ninth Revision, diagnosis codes

| Cancer Subtype                                                    | Diagnosis Code | Frequency |
|-------------------------------------------------------------------|----------------|-----------|
| Lip                                                               | 140            | 2         |
| Tongue                                                            | 141            | 2         |
| Salivary Glands                                                   | 142            | 2         |
| Mouth                                                             | 145            | 2         |
| Oropharynx                                                        | 146            | 3         |
| Esophagus                                                         | 150            | 3         |
| Stomach                                                           | 151            | 6         |
| Small Intestines                                                  | 152            | 2         |
| Colon                                                             | 153            | 15        |
| Rectum                                                            | 154            | 5         |
| Liver/Gallbladder                                                 | 155            | 17        |
| Gallbladder/Extrahepatic Bile Ducts                               | 156            | 1         |
| Pancreas                                                          | 157            | 10        |
| Lung                                                              | 162            | 31        |
| Pleura                                                            | 163            | 1         |
| Thymus Heart and Mediastinum                                      | 164            | 1         |
| Bone and Articular Cartilage                                      | 170            | 4         |
| Connective and Other Soft Tissue                                  | 171            | 4         |
| Skin                                                              | 172            | 26        |
| Skin                                                              | 173            | 297       |
| Breast                                                            | 174            | 66        |
| Cervix Uteri                                                      | 180            | 3         |
| Body of Uterus                                                    | 182            | 21        |
| Ovary and Other Uterine Adnexa                                    | 183            | 7         |
| Other and Unspecified Female Genital Organs                       | 184            | 2         |
| Prostate                                                          | 185            | 21        |
| Testis                                                            | 186            | 3         |
| Bladder                                                           | 188            | 11        |
| Kidney                                                            | 189            | 8         |
| Eye                                                               | 190            | 3         |
| Brain                                                             | 191            | 6         |
| Unspecified Parts of Nervous System                               | 192            | 2         |
| Thyroid                                                           | 193            | 17        |
| Other and Ill-defined Sites                                       | 195            | 7         |
| Lymph nodes                                                       | 196            | 23        |
| Secondary Malignant Neoplasm of Respiratory and Digestive Systems | 197            | 16        |
| Secondary Malignant Neoplasm of other Specified Sites             | 198            | 13        |
| Unspecified Site                                                  | 199            | 10        |
| Lymphosarcoma and Reticulosarcoma                                 | 200            | 5         |
| Hodgkins                                                          | 201            | 3         |
| Lymph nodes                                                       | 202            | 30        |
| Multiple Myeloma                                                  | 203            | 5         |
| Lymphoid Leukemia                                                 | 204            | 9         |
| Myeloid Leukemia                                                  | 205            | 9         |
| Leukemia of Unspecified Cell Type                                 | 208            | 5         |
| Carcinoma In Situ of Esophagus                                    | 230.1          | 1         |
| Anus                                                              | 230.5          | 1         |

|                                             |        |    |
|---------------------------------------------|--------|----|
| Anus                                        | 230.6  | 1  |
| Skin                                        | 232.2  | 3  |
| Skin                                        | 232.3  | 14 |
| Skin                                        | 232.4  | 2  |
| Skin                                        | 232.5  | 5  |
| Skin                                        | 232.6  | 15 |
| Skin                                        | 232.7  | 1  |
| Skin                                        | 232.9  | 6  |
| Breast                                      | 233    | 25 |
| Cervix                                      | 233.1  | 14 |
| Other and Unspecified Female Genital Organs | 233.3  | 1  |
| Vulva                                       | 233.32 | 4  |
| Prostate                                    | 233.4  | 2  |
| Bladder                                     | 233.7  | 6  |
| Other Specified Sites                       | 234.8  | 2  |

---
