# Supplementary material
Source: PubMed Central journal article supplement (PMC8359728)

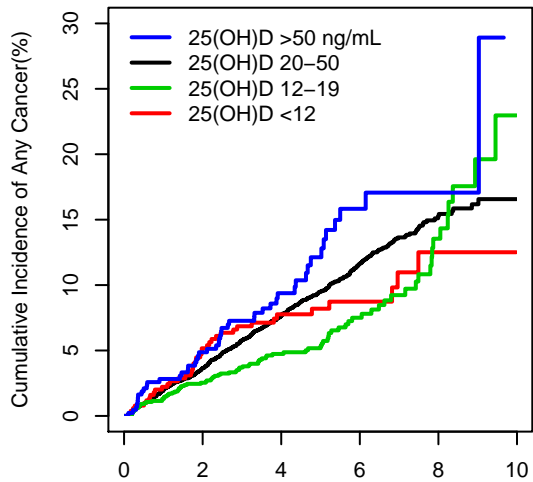

Years since Index 25(OH)D

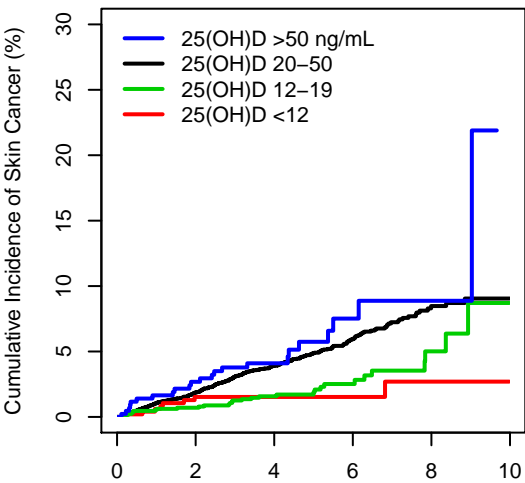

Years since Index 25(OH)D

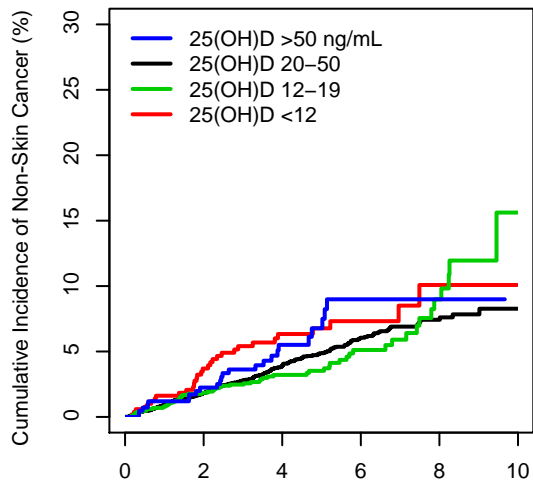

Years since Index 25(OH)D

Supplement: NIHMS1728573-supplement-2.pdf [file NIHMS1728573-supplement-2.pdf]
